# Supplementary material for: Knockdown of microRNA-214-3p Promotes Tumor Growth and Epithelial-Mesenchymal Transition in Prostate Cancer
Source: MDPI journal article supplement (doi:10.3390/cancers13235875), 2021-11-23
Supplement: s1 [file s1]

# **Knockdown of microRNA-214-3p Promotes Tumor Growth and Epithelial-Mesenchymal Transition in Prostate Cancer**

Patrice Cagle <sup>1</sup>, Nikia Smith <sup>1</sup>, Timothy O. Adekoya <sup>1</sup>, Yahui Li <sup>1</sup>, Susy Kim <sup>2</sup>, Leslimar Rios-Colon <sup>1</sup>, Gagan Deep <sup>2,3</sup>, Suryakant Niture <sup>1</sup>, Christopher Albanese <sup>4</sup>, Simeng Suy <sup>5</sup>, Sean P. Collins <sup>5</sup> and Deepak Kumar <sup>1,6,\*</sup>

<sup>1</sup> Julius L. Chambers Biomedical Biotechnology Research Institute, North Carolina Central University, Durham, NC 27707, USA; pcagle@nccu.edu (P.C.); nsmith47@nccu.edu (N.S.); tadekoya@nccu.edu (T.O.A.); yli6@nccu.edu (Y.L.); lrioscolon@nccu.edu (L.R-C.); sniture@nccu.edu (S.N.)

<sup>2</sup> Department of Cancer Biology, Wake Forest School of Medicine, Winston-Salem, NC 27157, USA; sukim@wakehealth.edu (S.K.); gdeep@wakehealth.edu (G.D.)

<sup>3</sup> Wake Forest Baptist Comprehensive Cancer Center, Wake Forest School of Medicine, Winston-Salem, NC 27157, USA

<sup>4</sup> Lombardi Comprehensive Cancer Center, Department of Oncology, Georgetown University Medical Center, Washington, DC 20057, USA; Albanese@georgetown.edu

<sup>5</sup> Department of Radiation Medicine, Georgetown University Hospital, Washington, DC 20007, USA; suys@georgetown.edu (S.S.); spc9@georgetown.edu (S.P.C.)

<sup>6</sup> Department of Pharmaceutical Sciences, North Carolina Central University, Durham, NC 27707, USA

\*Correspondence: dkumar@nccu.edu; Tel.: +1-919-530-7017

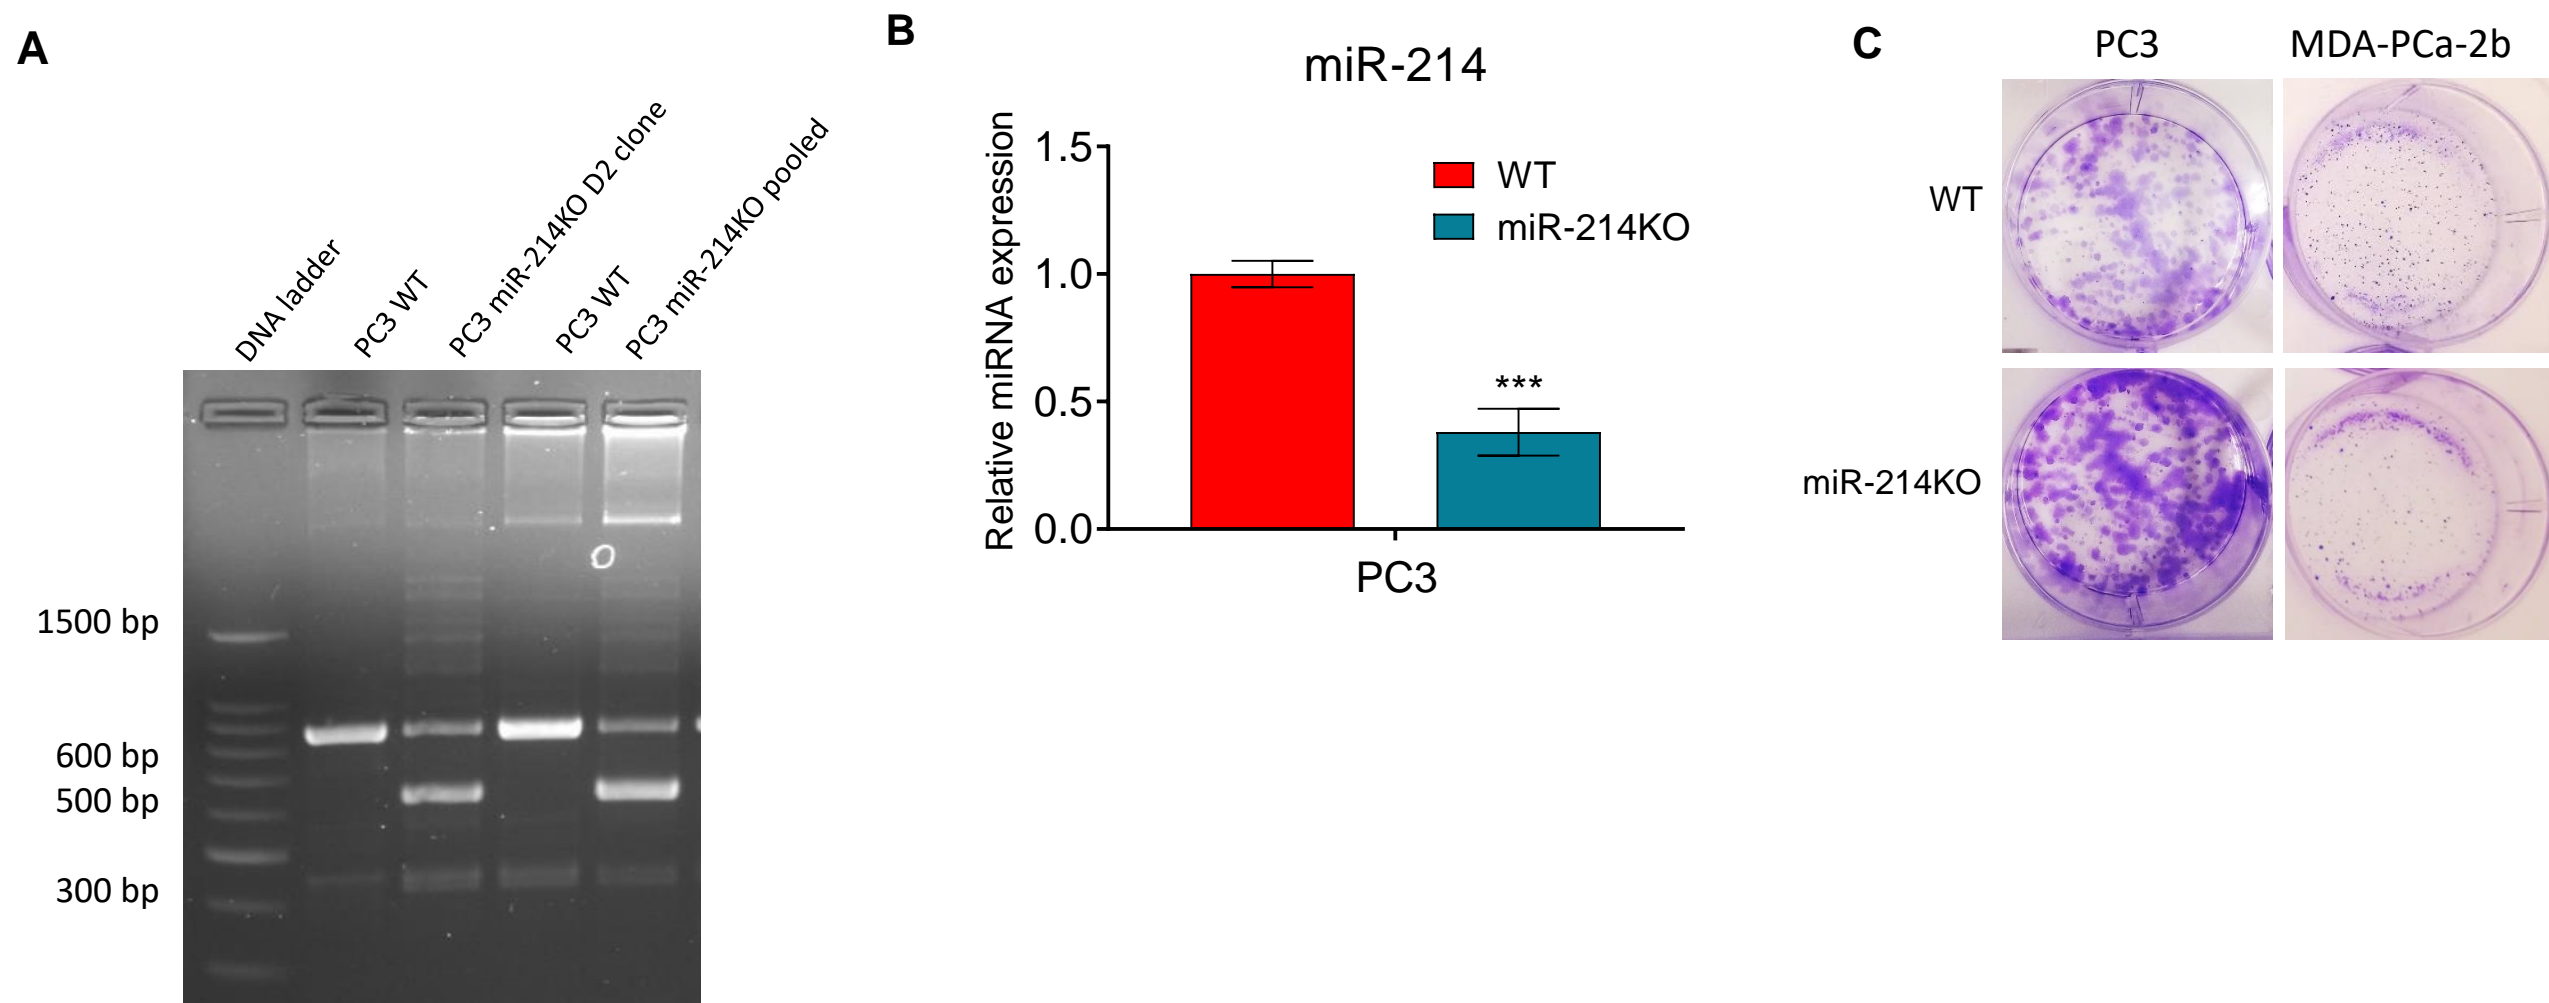

**Supplementary Figure S1. Downregulation of miR-214 in PCa cell lines** (A) DNA cleavage of miR-214 in PC3 clonal (D2 clone) and pooled cells by CRISPR/Cas9 is detected by PCR assay. (B) The relative expression of miR-214 was determined by qRT-PCR in WT PC3 cells compared to pooled miR-214KO PC3 cells. MiRNA levels were normalized to that of U44 RNA. Data are presented as mean  $\pm$  SEM, \*\*\*  $p < 0.0005$ . (C) Representative images of the effect of knockdown of miR-214 on PC3 and MDA-PCa-2b cell colony formation were determined by colony formation assay.

**S2**  
**A**

**PC3**

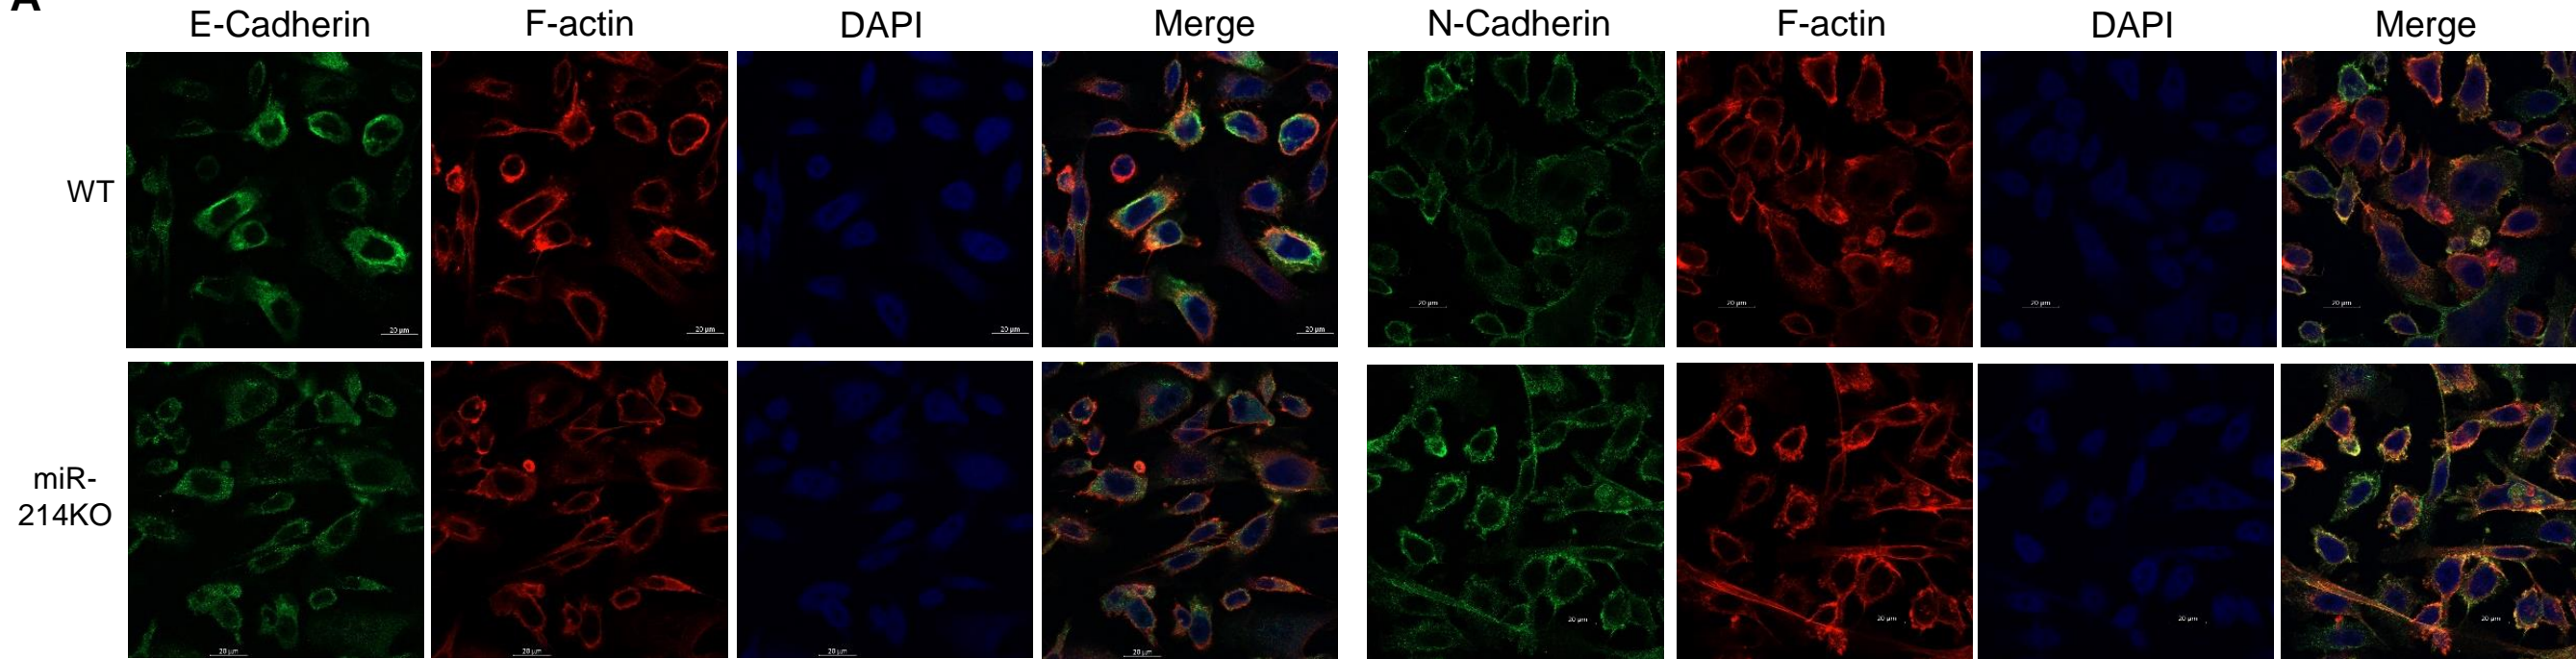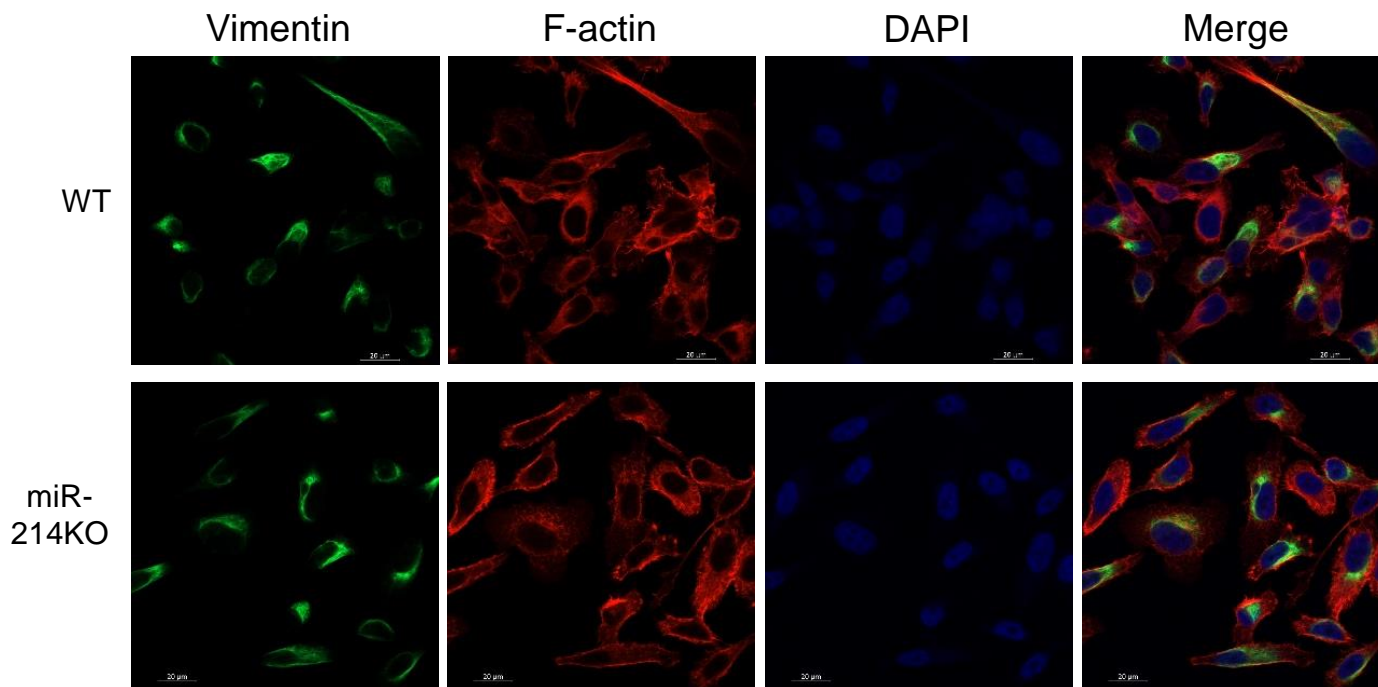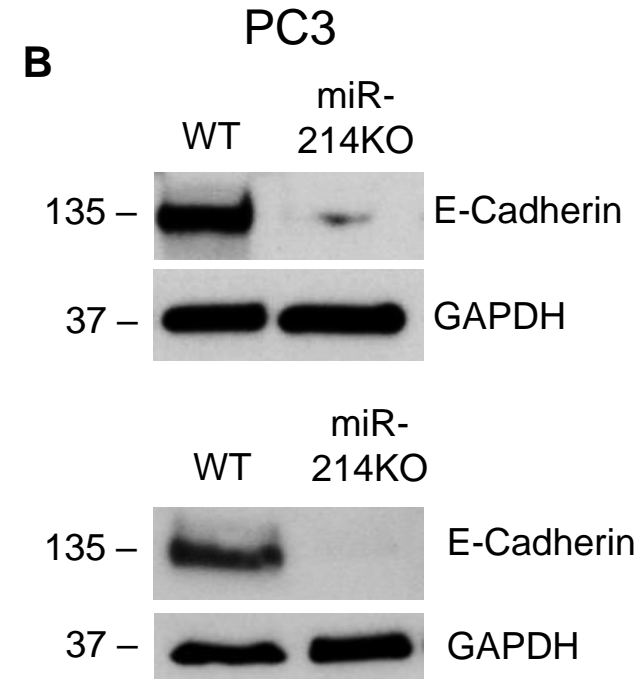

**Supplementary Figure S2. Immunofluorescence staining of EMT markers and E-Cadherin protein expression in PC3 cells (A)** F-actin, E-Cadherin, N-Cadherin, and Vimentin staining of miR-214 WT and KO PC3 cells. (B) Additional western blot analysis of E-Cadherin expression, from different PC3 cell lysates.



**S3**

**A**

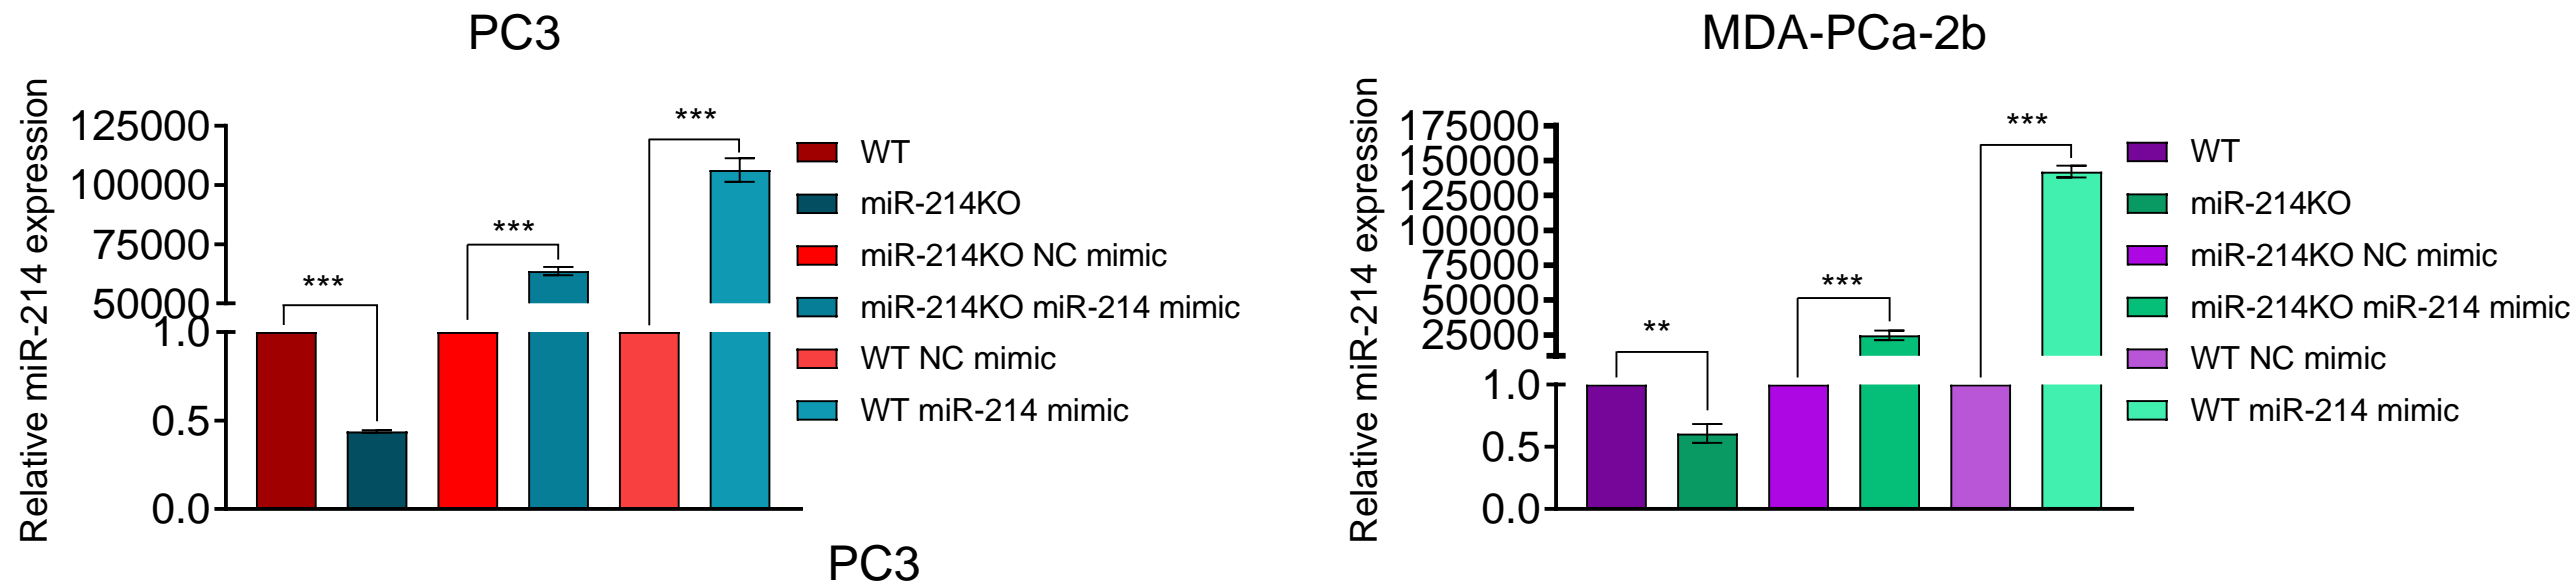

**B**

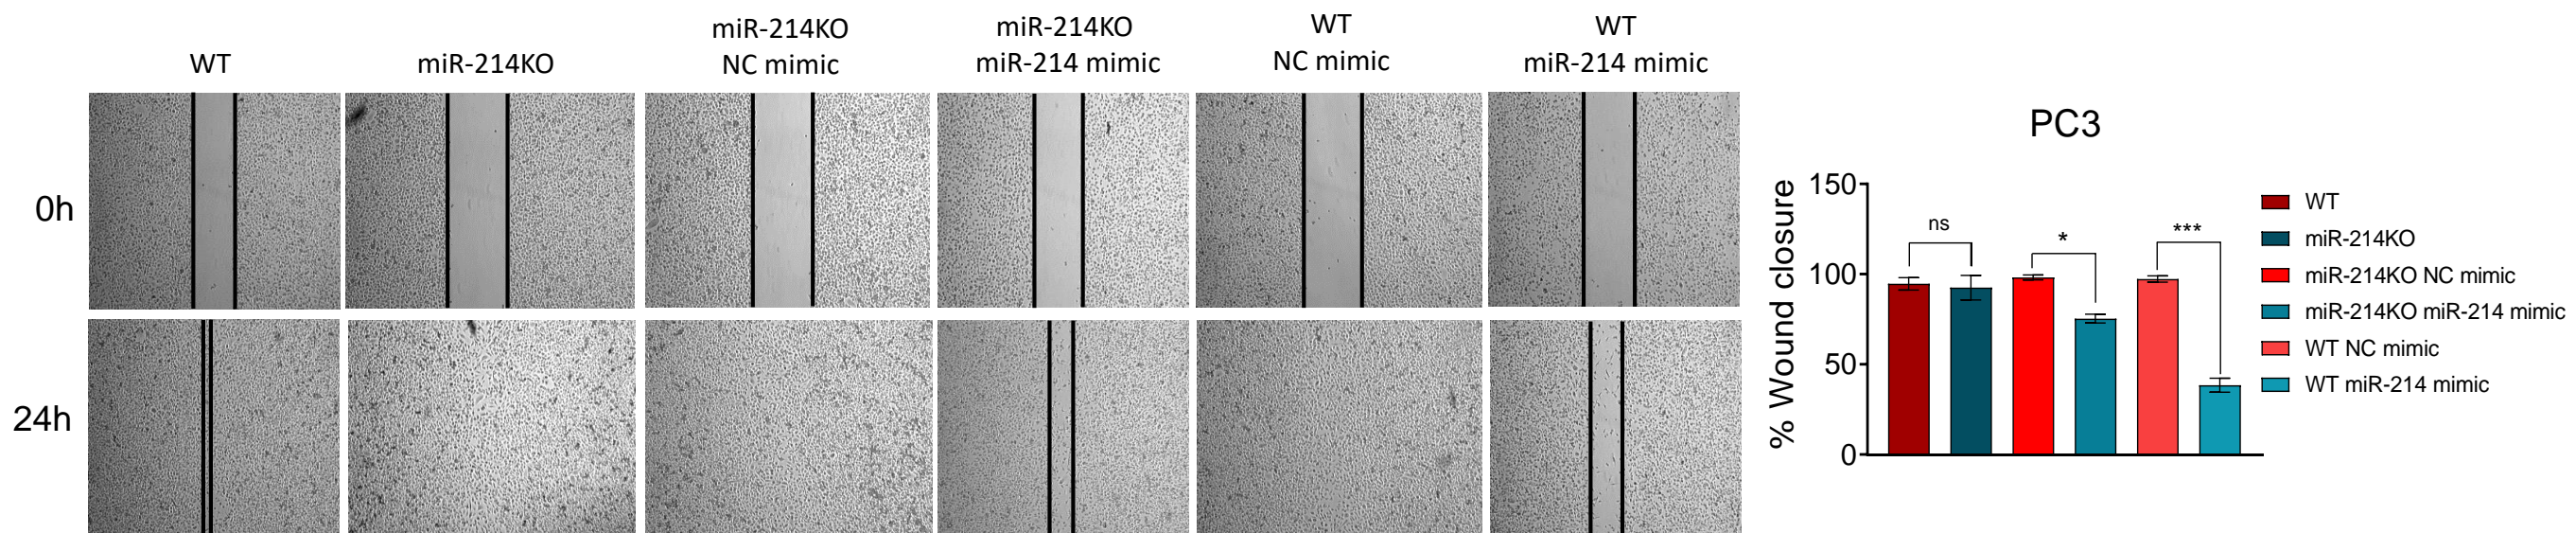

**Supplementary Figure S3. Effect of miR-214 overexpression in miR-214-depleted PCa cells** (A) Overexpression of miR-214 increased the expression of miR-214 in miR-214KO miR-214 mimic and WT miR-214 mimic PC3 and MDA-PCa-2b cells compared to miR-214KO NC mimic and WT NC mimic, respectively. The expression was determined by qRT-PCR, and U44 served as an internal control. (B) Wound healing assays were performed to investigate the changes of WT and miR-214KO PC3 cell migration ability upon overexpression of miR-214 compared with their negative controls. Representative photographs are presented in the left panels, the scratch area was calculated and graphically shown in the right panel. Data are presented as mean  $\pm$  SEM one-way ANOVA using Tukey's multiple comparisons test, \* $p < 0.05$ , \*\*\* $p < 0.0005$ , NS = not significant.

Table S1. Primer sets used for qRT-PCR

| Primer sets | Primers | Sequences (5'-3')              |
|-------------|---------|--------------------------------|
| PTK6        | Forward | CCTCTCCCATGACCACAATATC         |
|             | Reverse | GAGAATCCCAAAGGACCAGAC          |
| E-Cadherin  | Forward | CTC GAC ACC CGA TTC AAA GT     |
|             | Reverse | CCA GGC GTA GAC CAA GAA AT     |
| N-Cadherin  | Forward | GAC AGT TCC TGA GGG ATC AAA    |
|             | Reverse | CGA TTC TGT ACC TCA ACA TCC C  |
| Vimentin    | Forward | CAG CTT TCA AGT GCC TTT CTG    |
|             | Reverse | CTT GTA GGA GTG TCG GTT GTT    |
| CXCR4       | Forward | CCA CCA TCT ACT CCA TCA TCT TC |
|             | Reverse | ACT TGT CCG TCA TGC TTC TC     |
| PD-L1       | Forward | TCA CTA CAC AGC CCT CCT AA     |
|             | Reverse | ACA CCA GAA TAT GGC CAA GAG    |
| SESN3       | Forward | CTT CAG CAC CGT ACA CCT AAT C  |
|             | Reverse | GAG GAA GAA GCA GGC AGA AA     |
| ALK         | Forward | CCC ATC TTT GAC CCT ACA GTT C  |
|             | Reverse | GAG TTC TGG TAG GCG TTG TT     |
| SEMA6D      | Forward | GTC CTC ATC ACC TGT GTC TTT    |
|             | Reverse | GGC GGA CTC TGC ATC TTT AT     |
| PTN         | Forward | CCA TGA AGA CCC AGA GAT GTA AG |
|             | Reverse | CAG GCC TGG AAC TGG TAT TT     |
| EPHA5       | Forward | CCA GTG ATG TCT GGA GTT ATG G  |
|             | Reverse | GCC TTC CTC TAC CGC TTT AAT    |
| HSD17B2     | Forward | AGC ACT TTC TTC TCG GAC AC     |
|             | Reverse | GCC CTG AGC TCT TCT TGT ATT    |
| CYP1B1      | Forward | CTG TCT TGG GCT ACC ACA TT     |
|             | Reverse | GGA TCA AAG TTC TCC GGG TTA    |
| ADORA1      | Forward | ACC TGG AGG TCT TCT ACC TAA TC |
|             | Reverse | TCT TCA GCT CCT TCC CAT AGT    |
| SAA1        | Forward | TGA TCA GGC TGC CAA TGA A      |
|             | Reverse | TCC TGA GAG CAG AGT GAA GA     |
| DTX4        | Forward | GTC CCT CAT CTC CCT CAT CTA T  |
|             | Reverse | GCA GAT TGG ACC AGA CCA TAT T  |
| GAPDH       | Forward | GGT GTG AAC CAT GAG AAG TAT GA |
|             | Reverse | GAG TCC TTC CAC GAT ACC AAA G  |
|             |         |                                |

Table S2. Top 50 dysregulated mRNAs in PC3 cells

| Gene name           | log2Fold Change | pvalue    | padj      | Gene name             | log2Fold Change | pvalue    | padj      |
|---------------------|-----------------|-----------|-----------|-----------------------|-----------------|-----------|-----------|
| <i>Up-regulated</i> |                 |           |           | <i>Down-regulated</i> |                 |           |           |
| AL513323.1          | 9.93            | 6.94E-17  | 5.45E-16  | KRT16                 | -9.50           | 1.61E-14  | 1.10E-13  |
| GABRG3              | 8.95            | 2.99E-18  | 2.52E-17  | OVOL1                 | -8.78           | 1.47E-13  | 9.35E-13  |
| TCN1                | 7.74            | 0         | 0         | TMPRSS13              | -8.58           | 8.65E-13  | 5.21E-12  |
| PLD5                | 7.52            | 4.46E-13  | 2.74E-12  | MIR205HG              | -8.53           | 7.74E-13  | 4.68E-12  |
| ZFPM2               | 6.94            | 2.98E-124 | 2.24E-122 | KRT4                  | -8.45           | 2.14E-12  | 1.25E-11  |
| FO538757.2          | 6.87            | 1.53E-34  | 2.49E-33  | AC006372.2            | -8.45           | 2.26E-12  | 1.32E-11  |
| PCSK5               | 6.83            | 7.16E-48  | 1.69E-46  | CEACAM5               | -8.37           | 2.50E-12  | 1.46E-11  |
| AUTS2               | 6.37            | 1.98E-21  | 1.96E-20  | KRT17                 | -8.25           | 4.72E-12  | 2.71E-11  |
| TMEM108-AS1         | 6.33            | 3.34E-07  | 1.28E-06  | DAPP1                 | -8.18           | 1.95E-15  | 1.41E-14  |
| ADAMTS9             | 6.24            | 1.39E-20  | 1.32E-19  | ZNF486                | -7.84           | 1.28E-10  | 6.61E-10  |
| NLGN4X              | 6.14            | 1.01E-30  | 1.43E-29  | CASP14                | -7.84           | 1.43E-10  | 7.37E-10  |
| UBE2QL1             | 6.00            | 1.26E-135 | 1.05E-133 | ZBTB7C                | -7.80           | 7.65E-11  | 4.03E-10  |
| CSMD2               | 5.89            | 4.92E-15  | 3.47E-14  | MAL                   | -7.79           | 1.72E-10  | 8.80E-10  |
| PDPN                | 5.56            | 5.89E-16  | 4.42E-15  | SLC43A3               | -7.73           | 8.91E-147 | 8.53E-145 |
| PTPN5               | 5.48            | 7.77E-10  | 3.81E-09  | MACC1                 | -7.72           | 3.48E-74  | 1.35E-72  |
| SOBP                | 5.38            | 3.19E-20  | 2.99E-19  | CALB2                 | -7.64           | 3.81E-10  | 1.91E-09  |
| CNTN1               | 5.15            | 1.04E-41  | 2.09E-40  | TRIM29                | -7.40           | 2.29E-18  | 1.94E-17  |
| MN1                 | 4.79            | 1.47E-96  | 7.75E-95  | AC245041.1            | -7.37           | 9.43E-10  | 4.59E-09  |
| RNF152              | 4.71            | 2.44E-18  | 2.06E-17  | KCNK5                 | -7.35           | 2.40E-09  | 1.13E-08  |
| RUBCNL              | 4.69            | 4.72E-09  | 2.17E-08  | UGT1A1                | -7.35           | 2.50E-09  | 1.17E-08  |
| TMEM200A            | 4.68            | 5.92E-18  | 4.89E-17  | WNT10A                | -7.24           | 2.17E-09  | 1.02E-08  |
| ESM1                | 4.68            | 0         | 0         | CYP1B1                | -7.17           | 4.27E-125 | 3.25E-123 |
| GABRQ               | 4.59            | 2.30E-10  | 1.17E-09  | ST14                  | -7.17           | 1.21E-291 | 3.85E-289 |
| CHRD1               | 4.51            | 1.71E-16  | 1.32E-15  | FER1L6                | -7.14           | 4.89E-17  | 3.87E-16  |
| MUM1L1              | 4.48            | 7.94E-15  | 5.52E-14  | S100A14               | -7.06           | 4.47E-227 | 8.45E-225 |

Table S3. Top 50 dysregulated mRNAs in MDA-PCa-2b cells

| Gene.name           | log2Fold Change | pvalue    | padj      | Gene.name             | log2Fold Change | pvalue    | padj      |
|---------------------|-----------------|-----------|-----------|-----------------------|-----------------|-----------|-----------|
| <i>Up-regulated</i> |                 |           |           | <i>Down-regulated</i> |                 |           |           |
| MUC12               | 7.81            | 1.64E-10  | 7.04E-10  | MYCN                  | -7.17           | 1.10E-08  | 4.12E-08  |
| ZNF486              | 7.47            | 1.34E-09  | 5.39E-09  | AUTS2                 | -7.00           | 6.72E-36  | 8.49E-35  |
| FRG2HP              | 7.38            | 2.21E-09  | 8.72E-09  | CPA6                  | -6.97           | 3.38E-08  | 1.22E-07  |
| PI15                | 6.74            | 0         | 0         | NKX2-1                | -6.58           | 1.54E-198 | 2.08E-196 |
| EPHA6               | 6.25            | 4.90E-13  | 2.50E-12  | WIF1                  | -6.43           | 1.17E-81  | 3.92E-80  |
| AC021534.1          | 6.08            | 1.11E-06  | 3.51E-06  | SFTA3                 | -6.42           | 1.32E-09  | 5.29E-09  |
| MRAP2               | 5.43            | 9.46E-10  | 3.83E-09  | GSTA2                 | -6.10           | 1.21E-26  | 1.14E-25  |
| LINC01518           | 5.42            | 6.60E-07  | 2.13E-06  | NKX2-8                | -5.85           | 1.07E-97  | 4.61E-96  |
| TRIM49              | 5.40            | 6.98E-07  | 2.25E-06  | POU6F2                | -5.66           | 1.54E-10  | 6.65E-10  |
| CNTN5               | 5.26            | 7.81E-243 | 1.69E-240 | PCSK5                 | -5.44           | 5.24E-15  | 3.02E-14  |
| GPC5-AS1            | 5.22            | 3.72E-85  | 1.33E-83  | HOTAIR                | -5.23           | 8.80E-41  | 1.28E-39  |
| CREB5               | 5.18            | 2.48E-06  | 7.53E-06  | GBA3                  | -4.72           | 4.18E-09  | 1.62E-08  |
| MBNL2               | 5.13            | 5.29E-23  | 4.37E-22  | ADORA1                | -4.64           | 1.57E-37  | 2.07E-36  |
| DCAF4L2             | 5.09            | 1.32E-152 | 1.17E-150 | TMTC1                 | -4.52           | 0         | 0         |
| LRP12               | 5.08            | 1.09E-51  | 2.05E-50  | GSTA1                 | -4.46           | 5.77E-210 | 8.77E-208 |
| AP005435.1          | 5.08            | 2.10E-22  | 1.69E-21  | GLB1L3                | -4.42           | 2.85E-14  | 1.57E-13  |
| STMN4               | 5.07            | 4.61E-13  | 2.36E-12  | RORB                  | -4.36           | 4.74E-22  | 3.76E-21  |
| PCGEM1              | 4.77            | 1.27E-30  | 1.38E-29  | JCAD                  | -4.34           | 3.55E-95  | 1.46E-93  |
| AP001610.2          | 4.72            | 2.86E-07  | 9.56E-07  | HSD17B2               | -4.30           | 1.96E-10  | 8.38E-10  |
| CORIN               | 4.70            | 7.22E-50  | 1.29E-48  | LINC02463             | -4.30           | 8.54E-09  | 3.23E-08  |
| AC010967.1          | 4.69            | 3.29E-07  | 1.09E-06  | HOXC12                | -4.22           | 3.21E-123 | 1.99E-121 |
| CHRM3               | 4.64            | 2.65E-270 | 6.86E-268 | EML6                  | -4.12           | 5.60E-200 | 7.77E-198 |
| DYNC11I1            | 4.63            | 7.12E-29  | 7.22E-28  | HPSE2                 | -4.09           | 2.49E-275 | 6.69E-273 |
| PLPPR4              | 4.61            | 3.69E-16  | 2.24E-15  | CHN2                  | -4.09           | 3.08E-09  | 1.20E-08  |
| CA9                 | 4.53            | 2.17E-12  | 1.07E-11  | C4orf19               | -4.05           | 6.27E-45  | 9.95E-44  |
