# Supplementary material for: Knockdown of microRNA-214-3p Promotes Tumor Growth and Epithelial-Mesenchymal Transition in Prostate Cancer
Source: MDPI journal article supplement (doi:10.3390/cancers13235875), 2021-11-23
Supplement: s1 [file s1]

# **Knockdown of microRNA-214-3p Promotes Tumor Growth and Epithelial-Mesenchymal Transition in Prostate Cancer**

Patrice Cagle <sup>1</sup>, Nikia Smith <sup>1</sup>, Timothy O. Adekoya <sup>1</sup>, Yahui Li <sup>1</sup>, Susy Kim <sup>2</sup>, Leslimar Rios-Colon <sup>1</sup>, Gagan Deep <sup>2,3</sup>, Suryakant Niture <sup>1</sup>, Christopher Albanese <sup>4</sup>, Simeng Suy <sup>5</sup>, Sean P. Collins <sup>5</sup> and Deepak Kumar <sup>1,6,\*</sup>

<sup>1</sup> Julius L. Chambers Biomedical Biotechnology Research Institute, North Carolina Central University, Durham, NC 27707, USA; pcagle@nccu.edu (P.C.); nsmith47@nccu.edu (N.S.); tadekoya@nccu.edu (T.O.A.); yli6@nccu.edu (Y.L.); lrioscolon@nccu.edu (L.R-C.); sniture@nccu.edu (S.N.)

<sup>2</sup> Department of Cancer Biology, Wake Forest School of Medicine, Winston-Salem, NC 27157, USA; sukim@wakehealth.edu (S.K.); gdeep@wakehealth.edu (G.D.)

<sup>3</sup> Wake Forest Baptist Comprehensive Cancer Center, Wake Forest School of Medicine, Winston-Salem, NC 27157, USA

<sup>4</sup> Lombardi Comprehensive Cancer Center, Department of Oncology, Georgetown University Medical Center, Washington, DC 20057, USA; Albanese@georgetown.edu

<sup>5</sup> Department of Radiation Medicine, Georgetown University Hospital, Washington, DC 20007, USA; suys@georgetown.edu (S.S.); spc9@georgetown.edu (S.P.C.)

<sup>6</sup> Department of Pharmaceutical Sciences, North Carolina Central University, Durham, NC 27707, USA

\*Correspondence: dkumar@nccu.edu; Tel.: +1-919-530-7017

PC3

MDA-PCa-2b

miR-  
WT 214KO

miR-  
WT 214KO

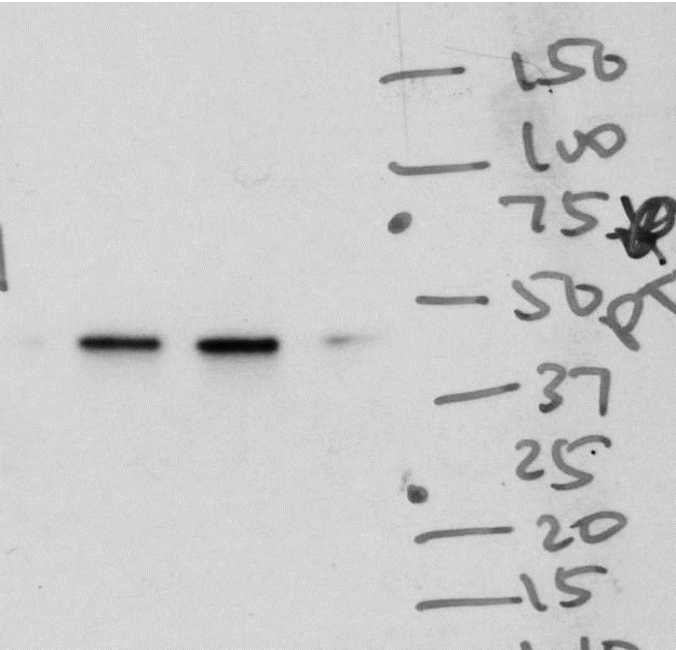

PTK6

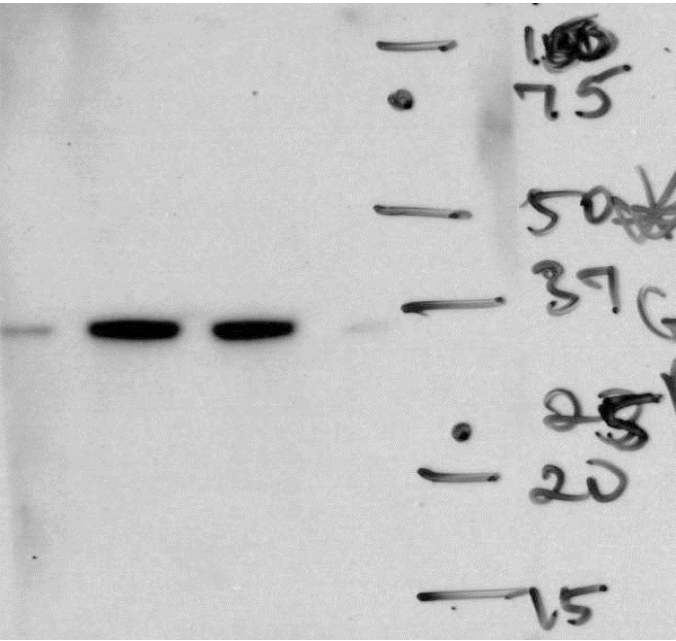

GAPDH

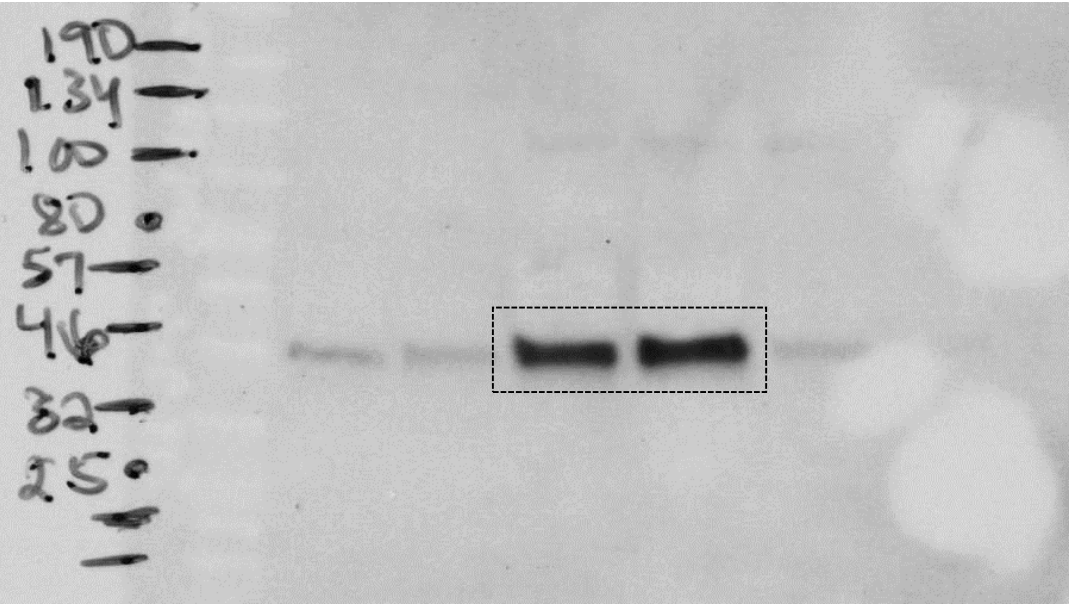

PTK6

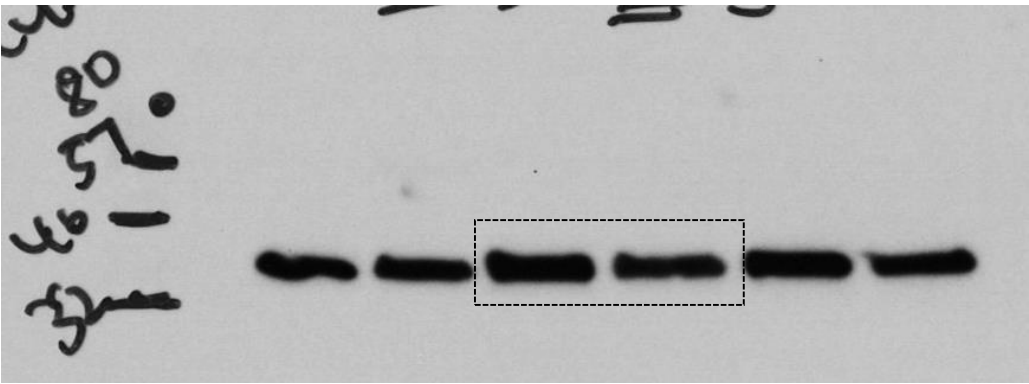

GAPDH

**File S1.E (S1.E):** Full length images of blots for Fig 1 E in main paper. Dotted rectangles indicate the regions used in the figures. PVDF membranes were used for probing with the respective primary antibody.

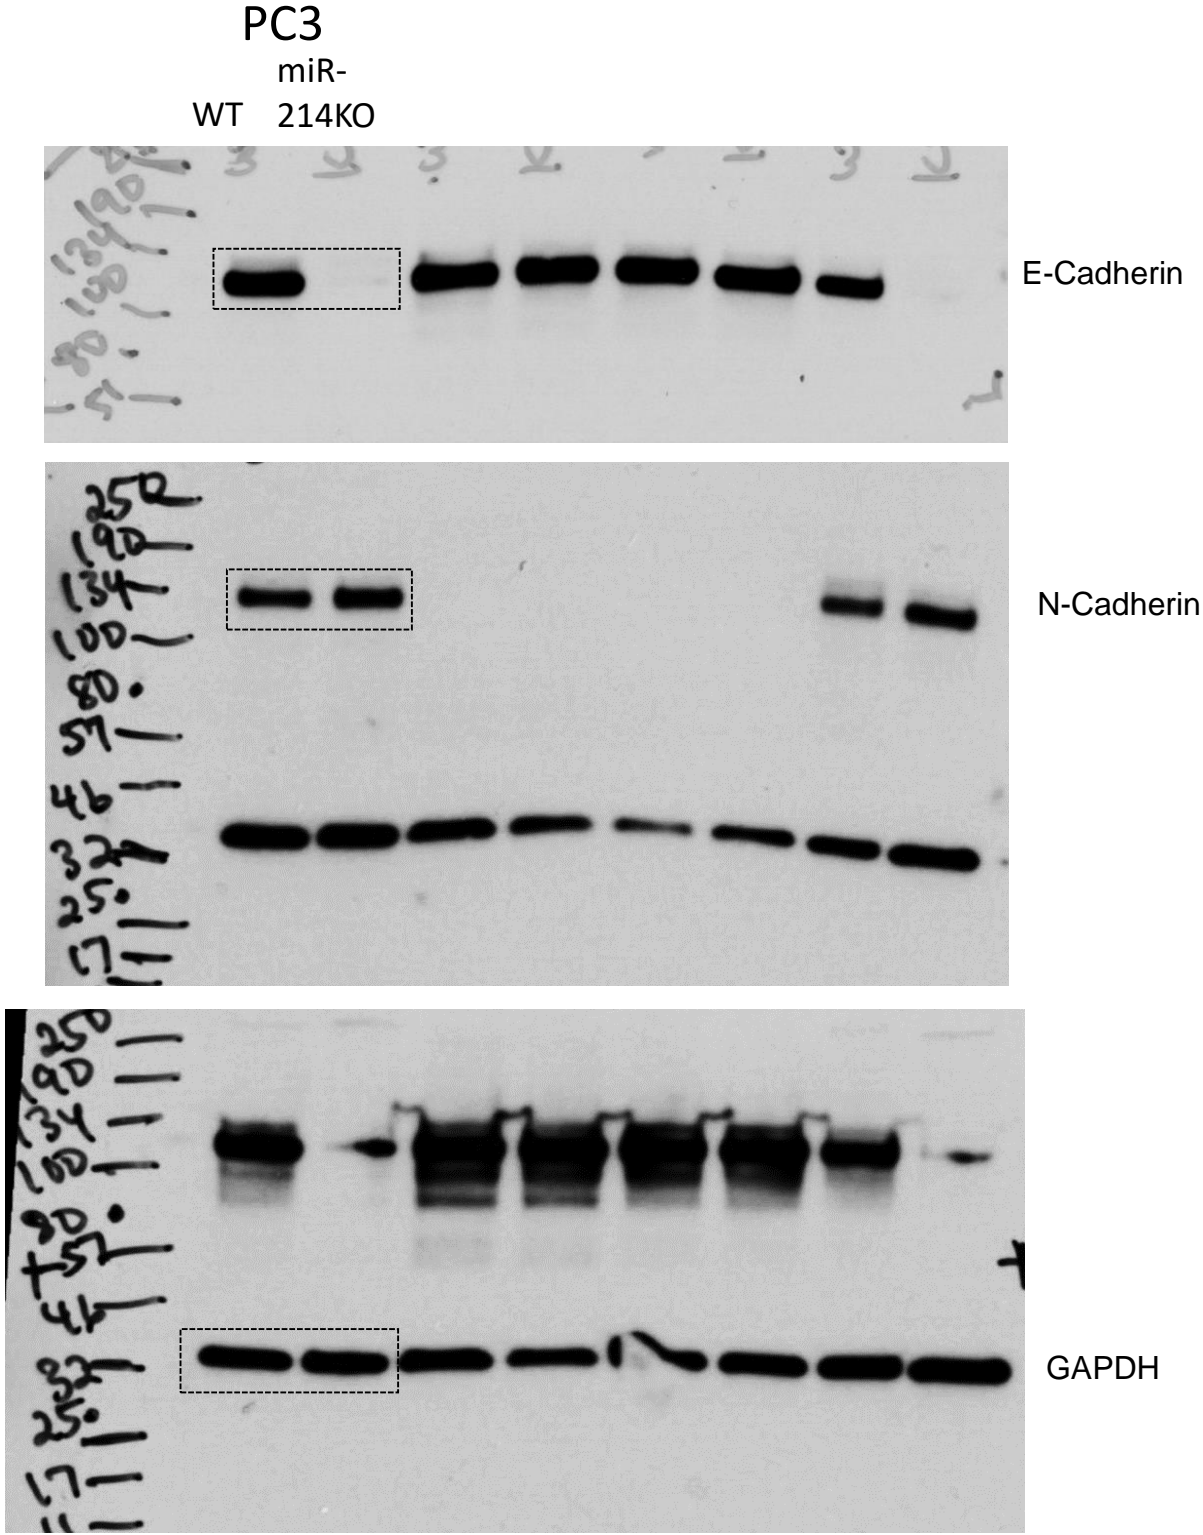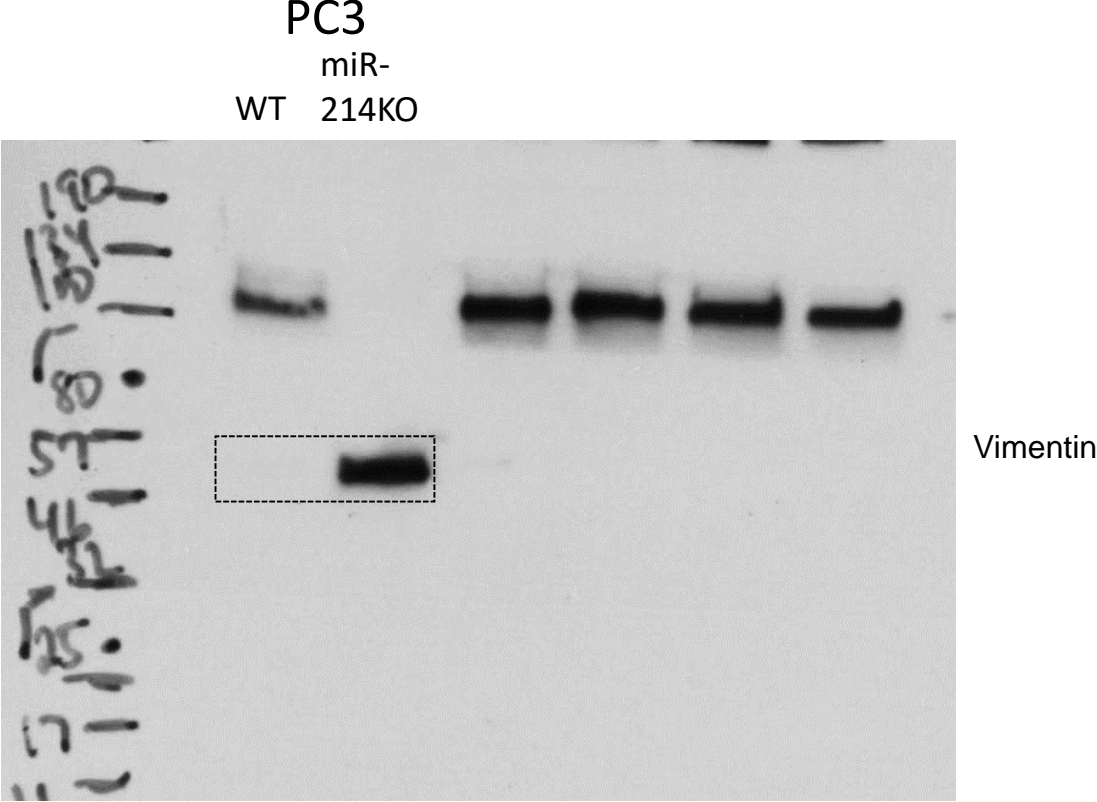

**File S2.E (S2.E):** Full length images of blots for Fig 2 E in main paper. Dotted rectangles indicate the regions used in the figures. PVDF membranes were used for probing with the respective primary antibody.

NC mimic  
miR-214  
mimic  
WT  
miR-214KO

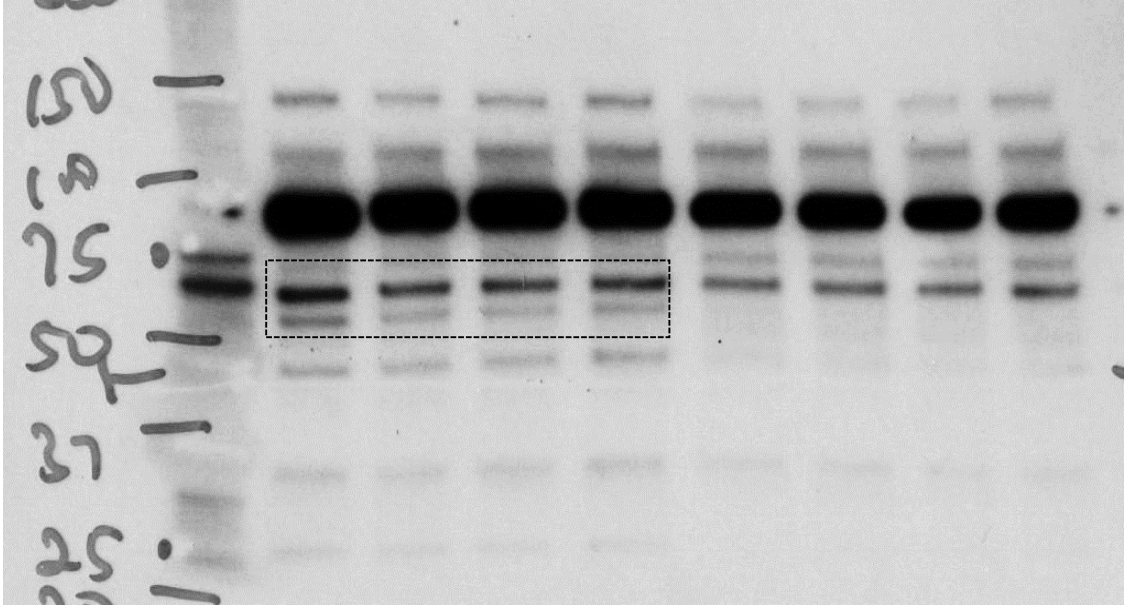

CXCR4

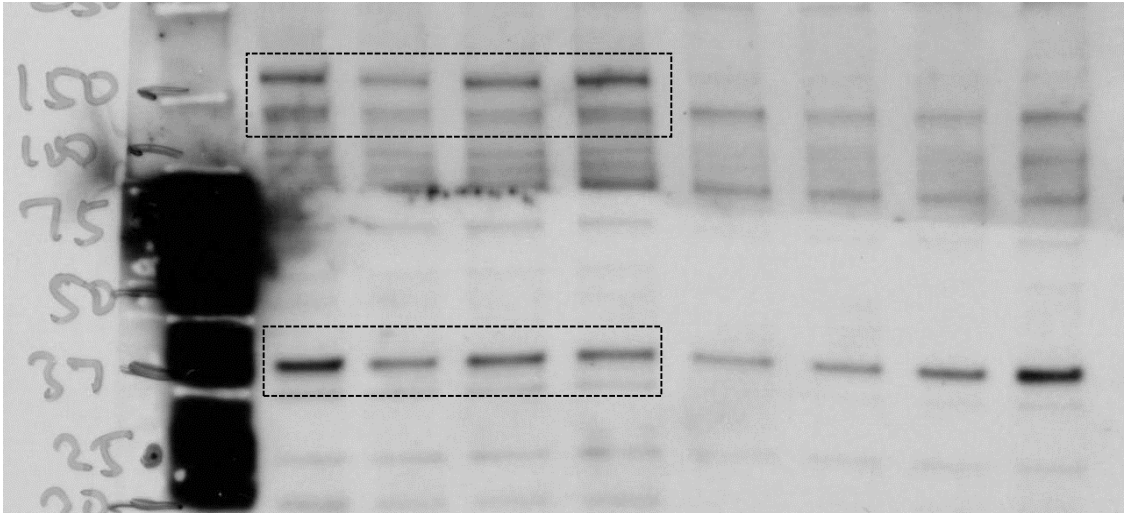

ALK

PD-L1

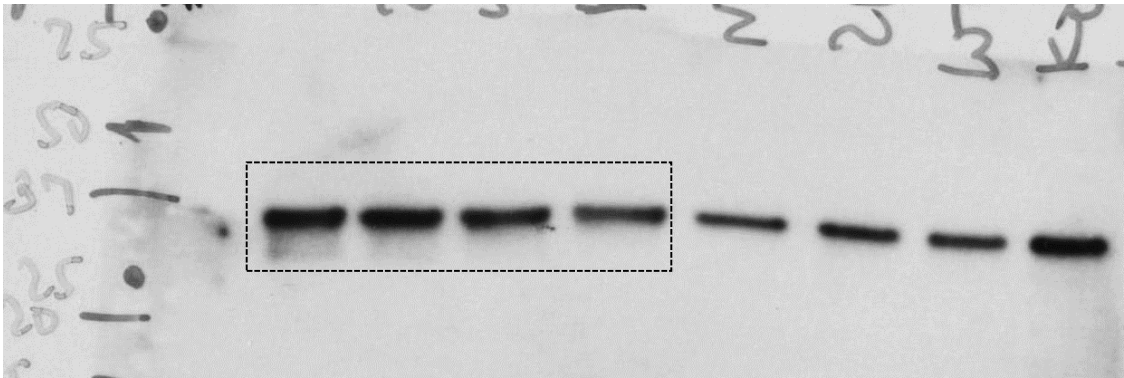

GAPDH

NC mimic  
miR-214  
mimic  
WT  
miR-214KO

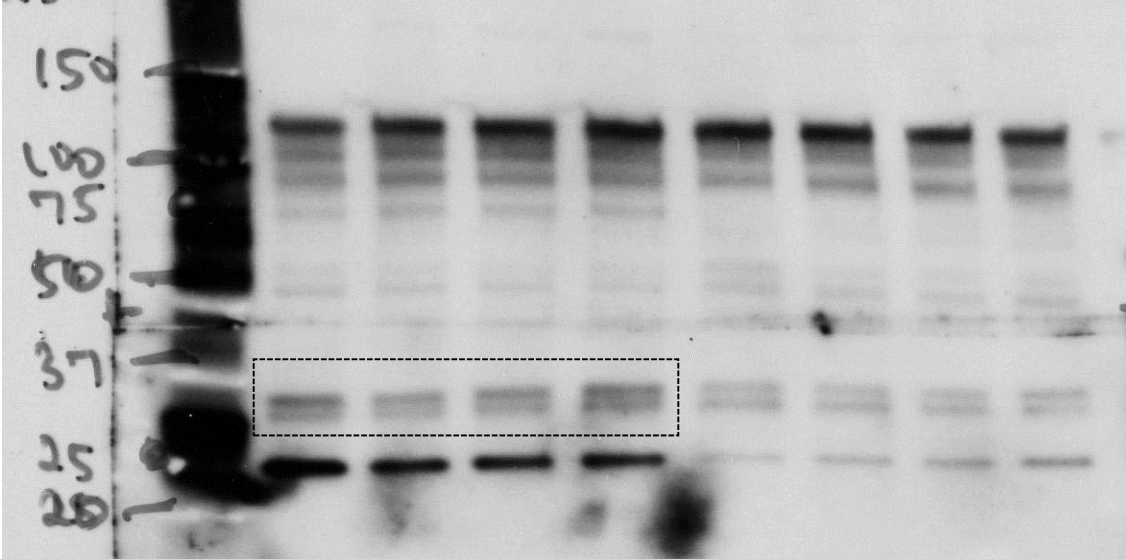

SESN3

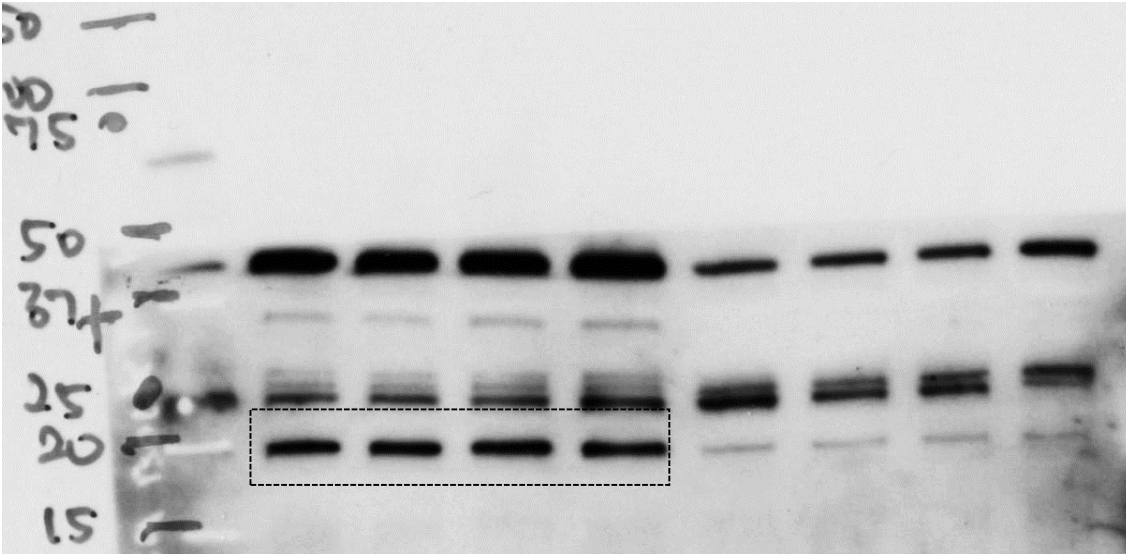

SAA1

**File S5.H (S5.H):** Full length images of blots for Fig 5 H in main paper. Dotted rectangles indicate the regions used in the figures. PVDF membranes were used for probing with the respective primary antibody.



MDA-PCa-2b

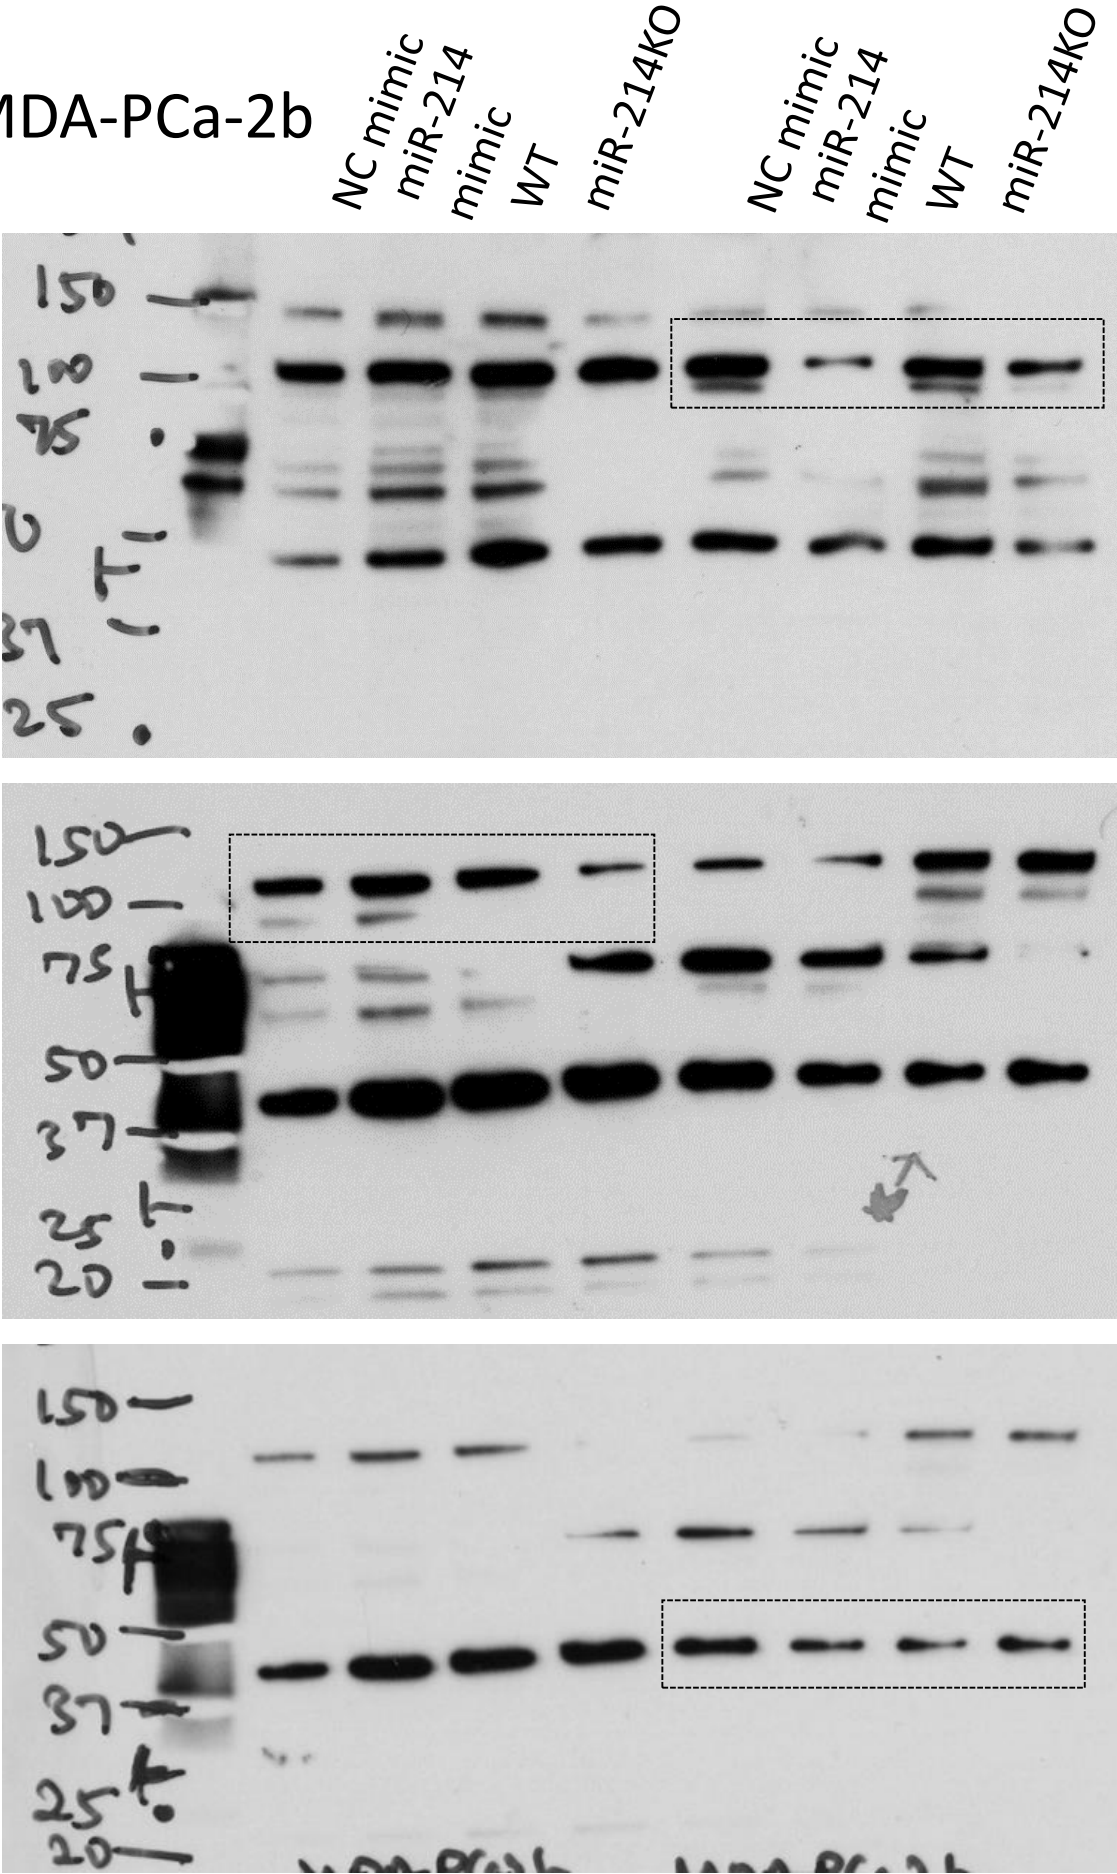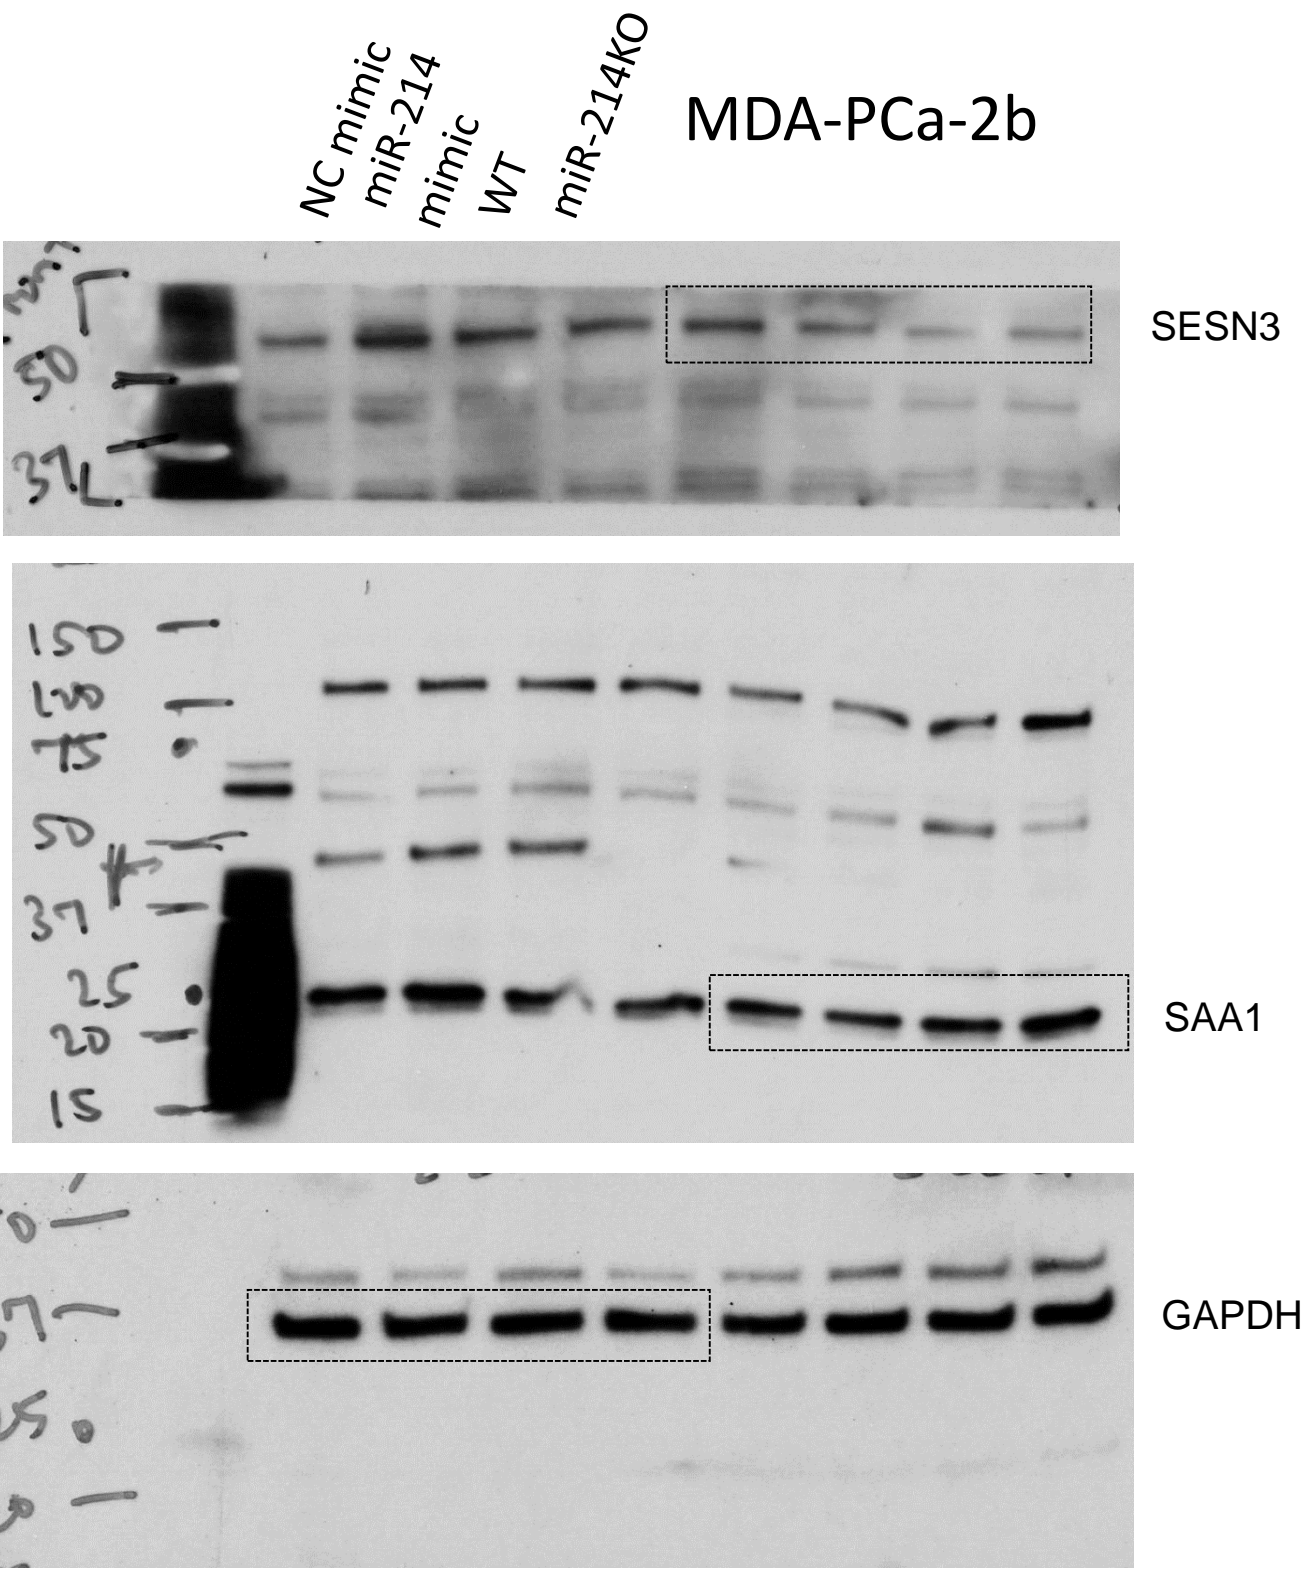

**File S5.I (S5.I):** Full length images of blots for Fig 5 I in main paper. Dotted rectangles indicate the regions used in the figures. PVDF membranes were used for probing with the respective primary antibody.

File S6.F

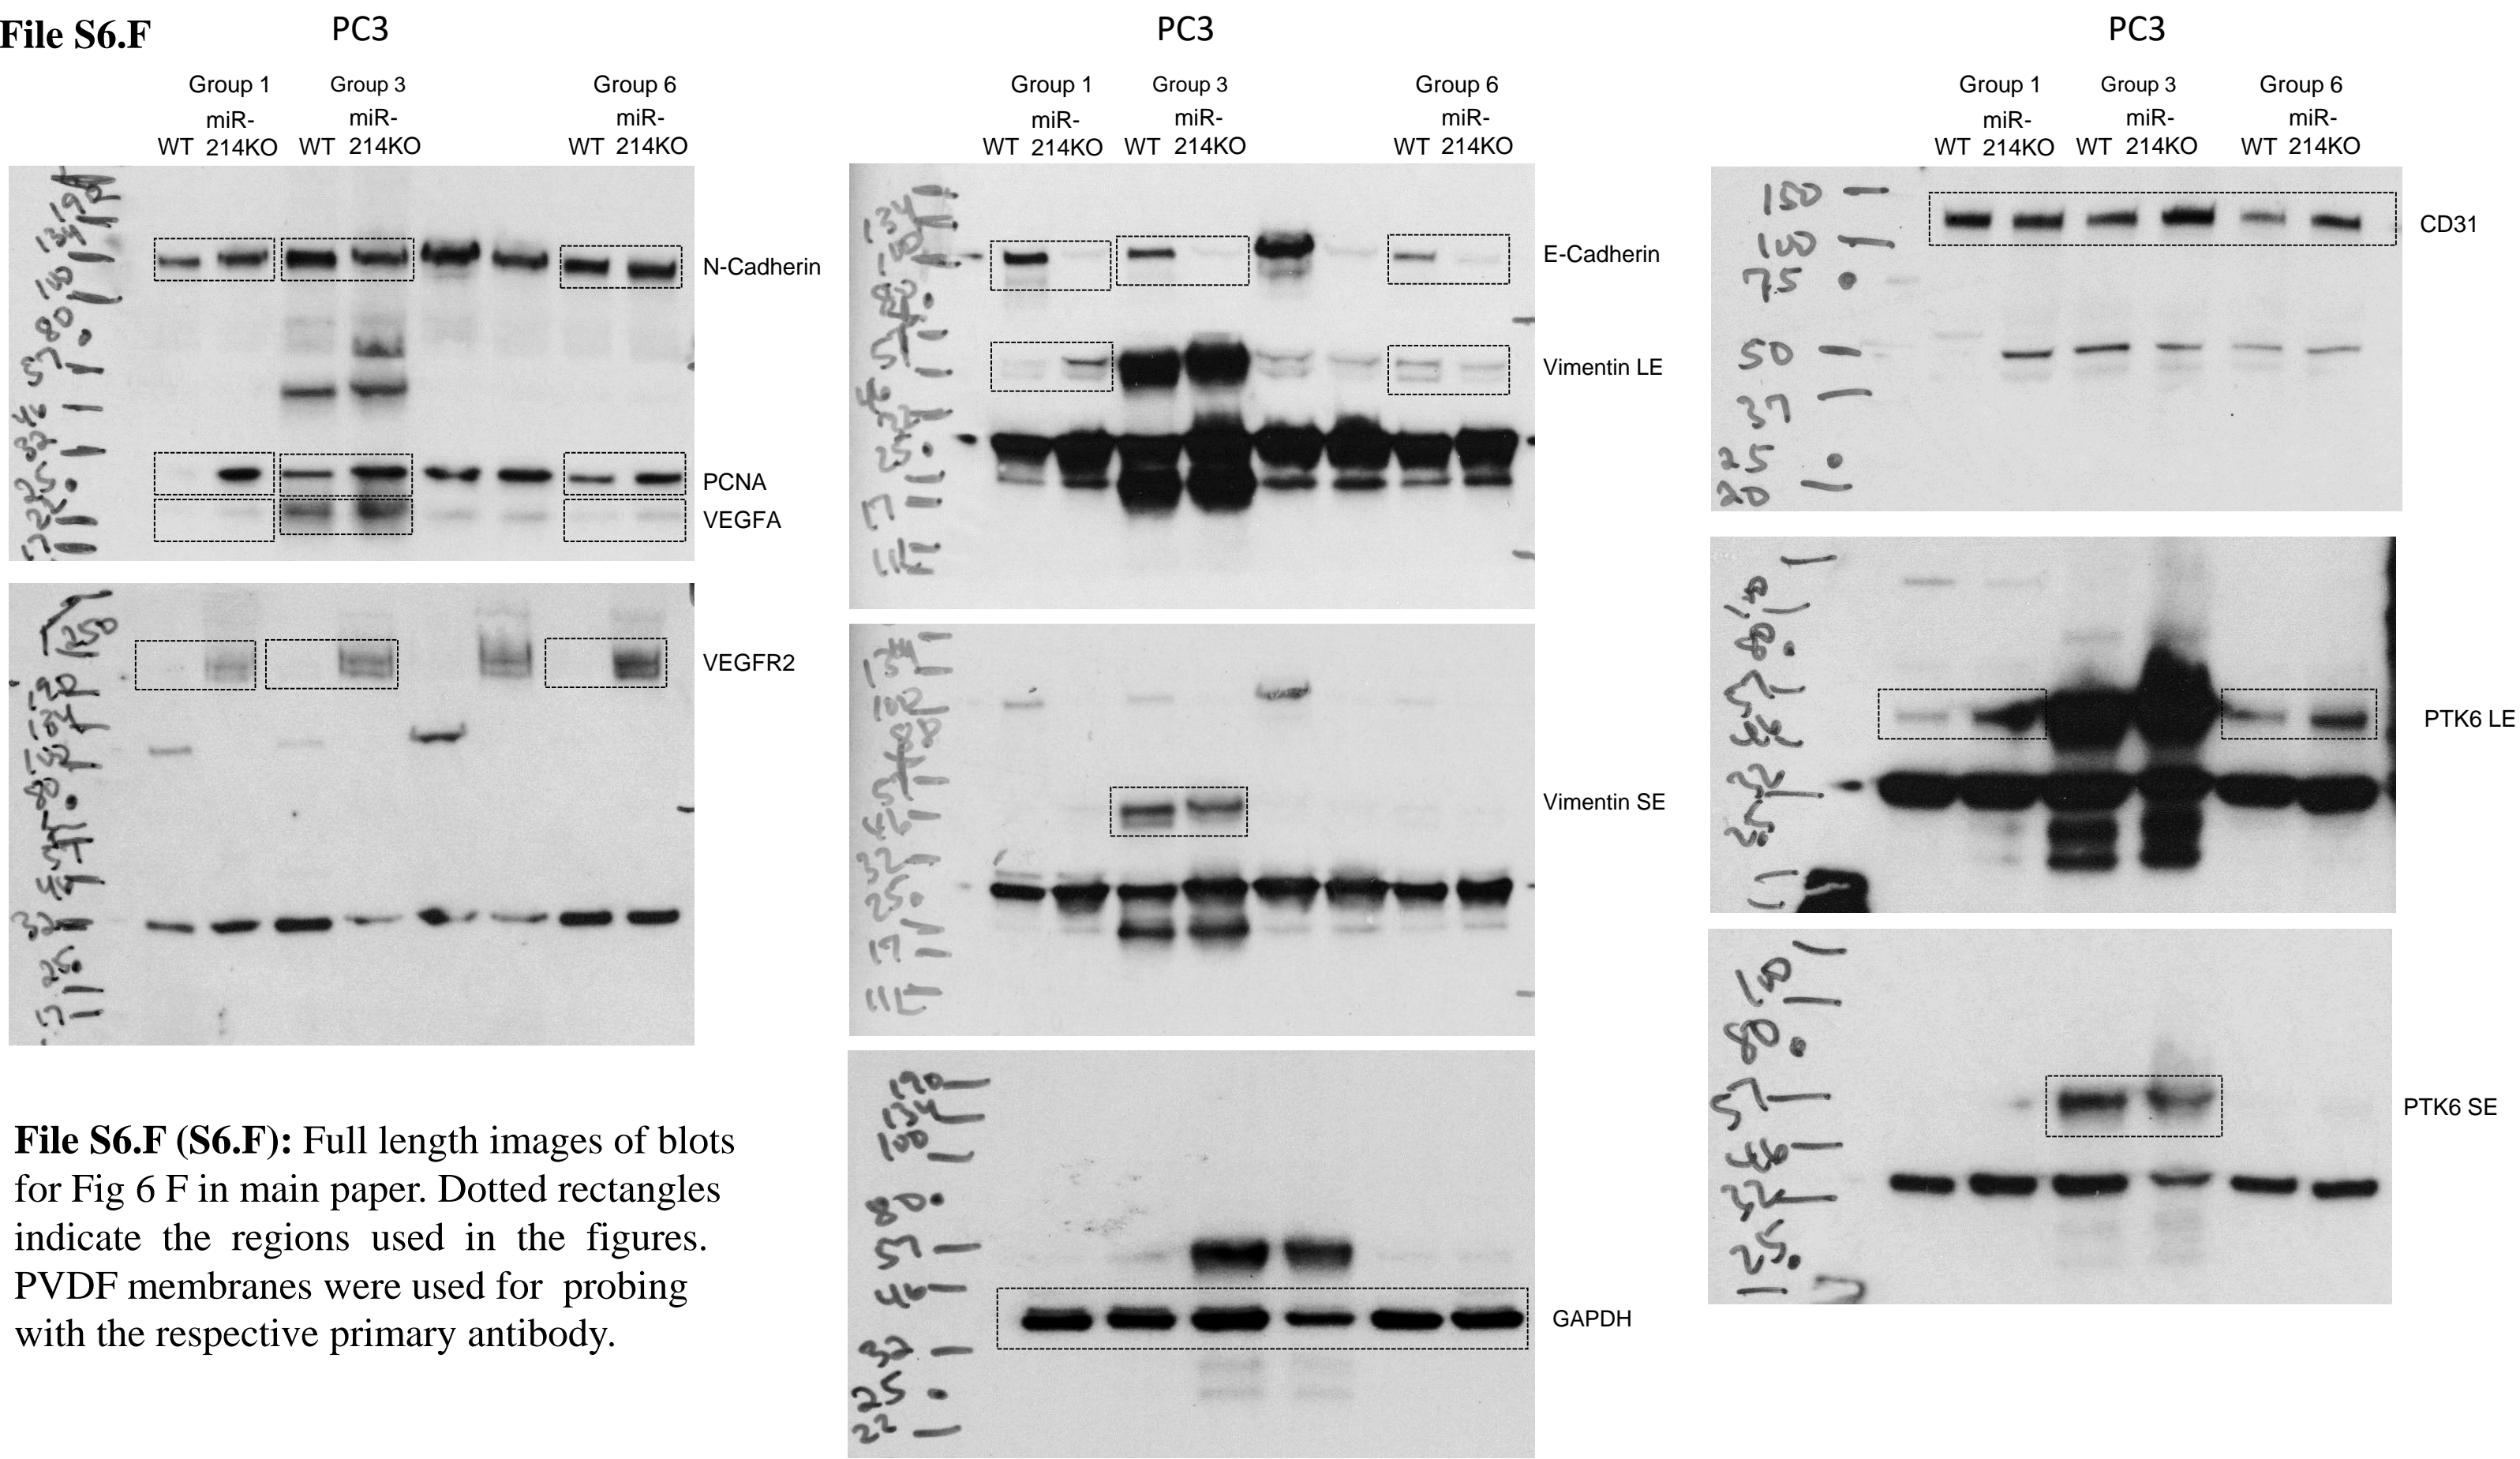



Supplementary Fig File S2.B

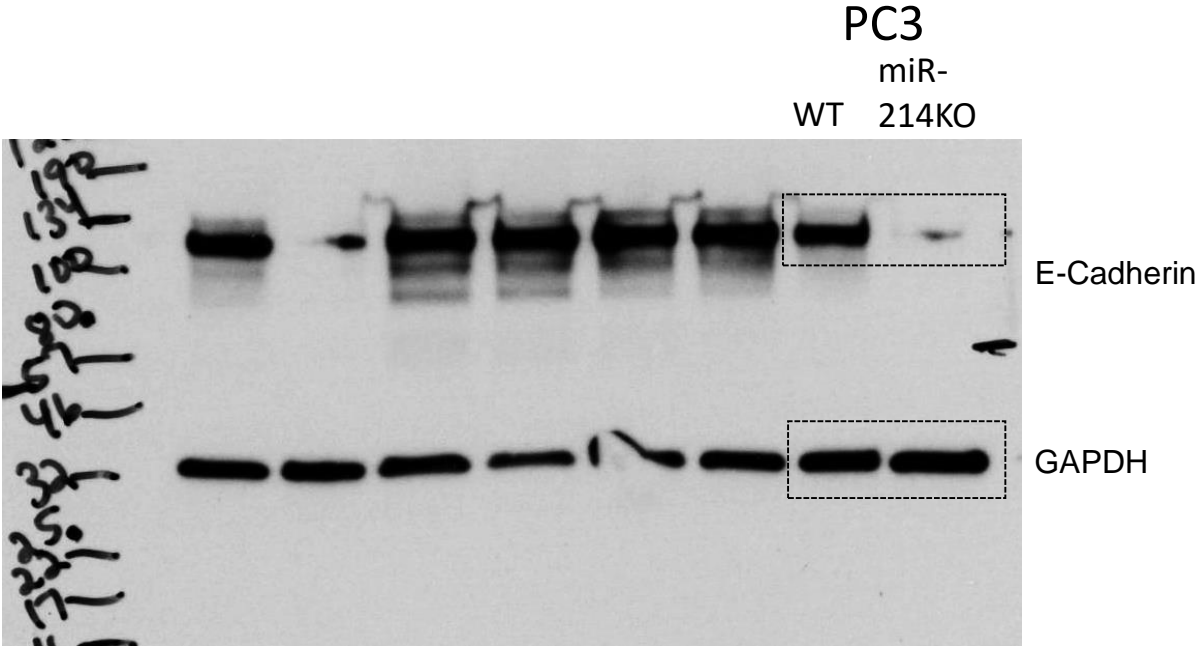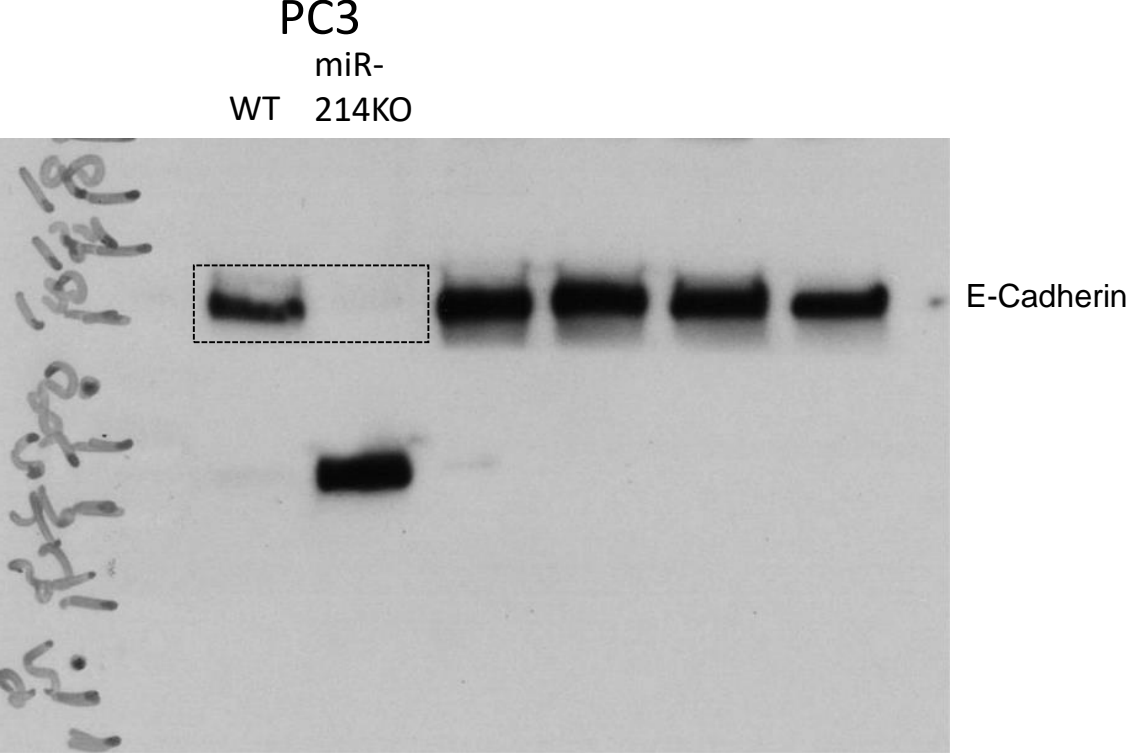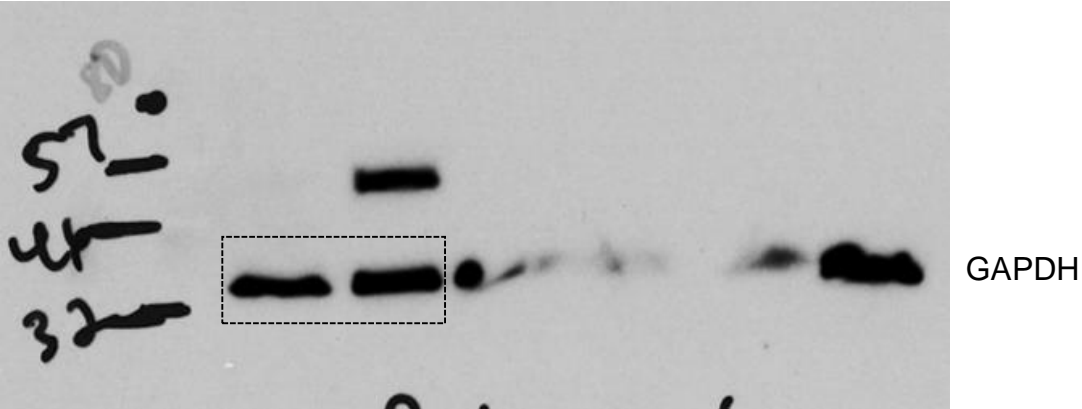

**Supplementary Fig File S2.B (S2.B):** Full length images of blots for Supp Fig S2 B in supplementary files. Dotted rectangles indicate the regions used in the figures. PVDF membranes were used for probing with the respective primary antibody.
